# Supplementary material
Source: MDPI journal article supplement (https://www.mdpi.com/1424-8247/17/5/554)
Supplement: s1 [file s1]

# Global Health Priority Box: Discovering Flucofuron as a Promising Antikinetoplastid Compound

## Highlights

- New therapies against leishmaniasis and Chagas disease are needed.
- Compound libraries are a good source of new compounds to test.
- Flucofuron demonstrated activity against *T. cruzi* and *L. amazonensis*.
- Flucofuron produce Programmed Cell Death in *T. cruzi* and *L. amazonensis*.

## Supplementary Materials

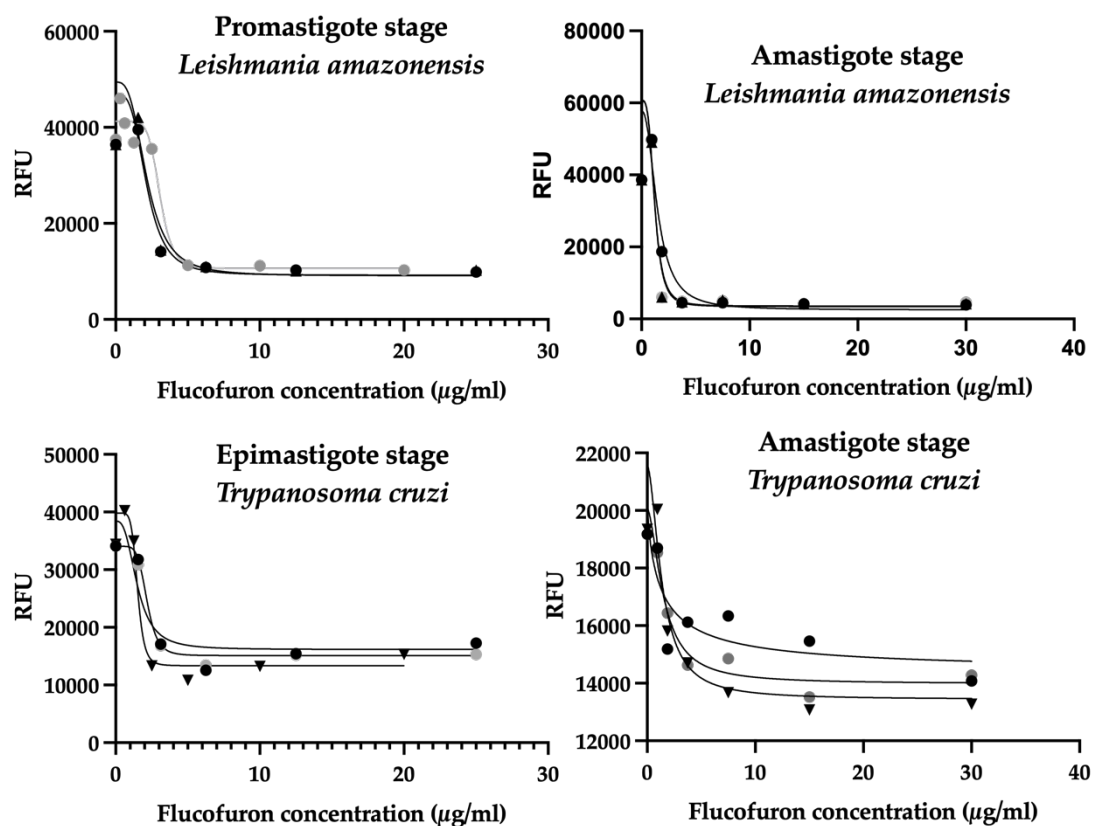

**Figure S1.** Graphs representing the flucofuron concentration against to RFU (Relative fluorescence units) in the both stages of *Trypanosoma cruzi* and *Leishmania amazonensis*. Each curve represents the two repetitions performed in one day using non-linear regression [Inhibitor] vs response – Variable slope (four parameters) by non-linear regression analysis with 95 % confidence, using the GraphPad Prism 9.0.0 statistical software.
